# Supplementary material for: MicroRNA-155 coordinates the immunological landscape within murine melanoma and correlates with immunity in human cancers
Source: JCI journal article supplement (doi:10.1172/jci.insight.126543), 2019-02-05
Supplement: sd1 [file 1]

**MicroRNA-155 coordinates the immunological landscape within murine melanoma and correlates with immunity in human cancers**

**SUPPLEMENTARY FIGURES**

H. Atakan Ekiz<sup>1,2</sup>, Thomas B. Huffaker<sup>1,2</sup>, Allie H. Grossmann<sup>3,4,5</sup>, W. Zac Stephens<sup>2</sup>, Matthew A. Williams<sup>2</sup>, June L. Round<sup>2</sup> and Ryan M. O'Connell<sup>2, \*</sup>

<sup>2</sup> Division of Microbiology and Immunology,

<sup>3</sup> Division of Anatomic Pathology Department of Pathology, University of Utah,  
[15 N. Medical Dr. East, JMRB, Salt Lake City, UT, 84112](#)

<sup>4</sup> Huntsman Cancer Institute, University of Utah Health Sciences Center,  
[2000 Circle of Hope Drive, Salt Lake City, UT, 84112, USA](#)

<sup>5</sup> ARUP Laboratories, University of Utah,  
[500 Chipeta Way, Salt Lake City, UT 84112, USA](#)

\* Direct all correspondence to: Ryan M. O'Connell ([ryan.oconnell@path.utah.edu](mailto:ryan.oconnell@path.utah.edu))

phone: (801) 213-4153

<sup>1</sup> equal contribution

**Conflict of Interest statement:** The authors have declared that no conflict of interest exists.

**Running Title:** scSeq defines miR-155's role in antitumor immunity

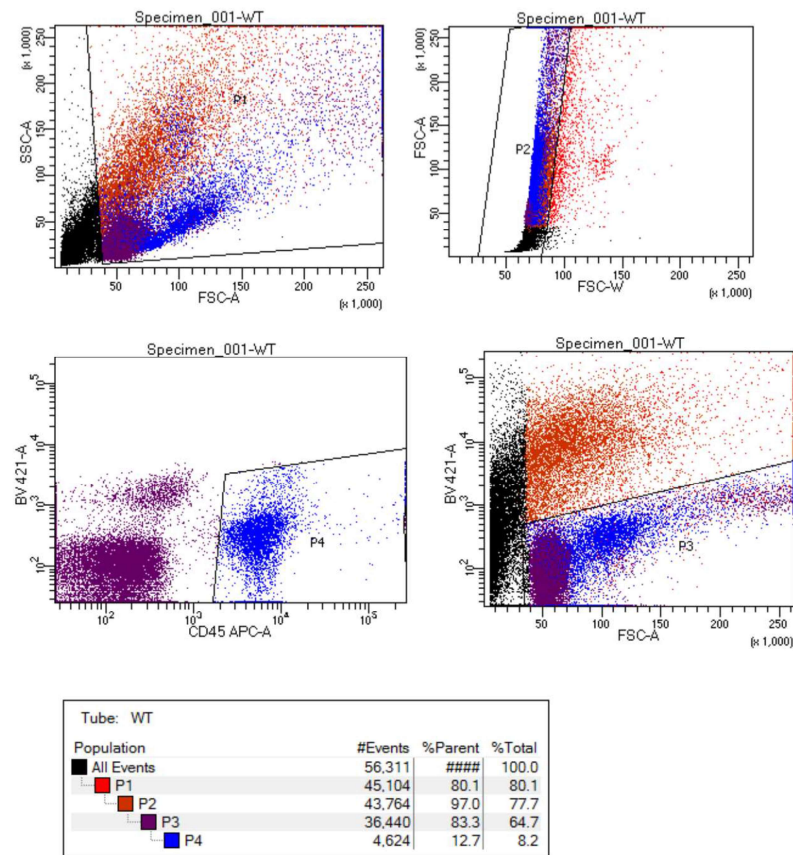

**Figure S1 – Flow cytometric sorting of tumor-infiltrating immune cells.** Representative flow cytometry plots showing the methodology for sorting tumor infiltrating live immune cells as marked by CD45+DAPI- phenotype (blue color in dot plots).

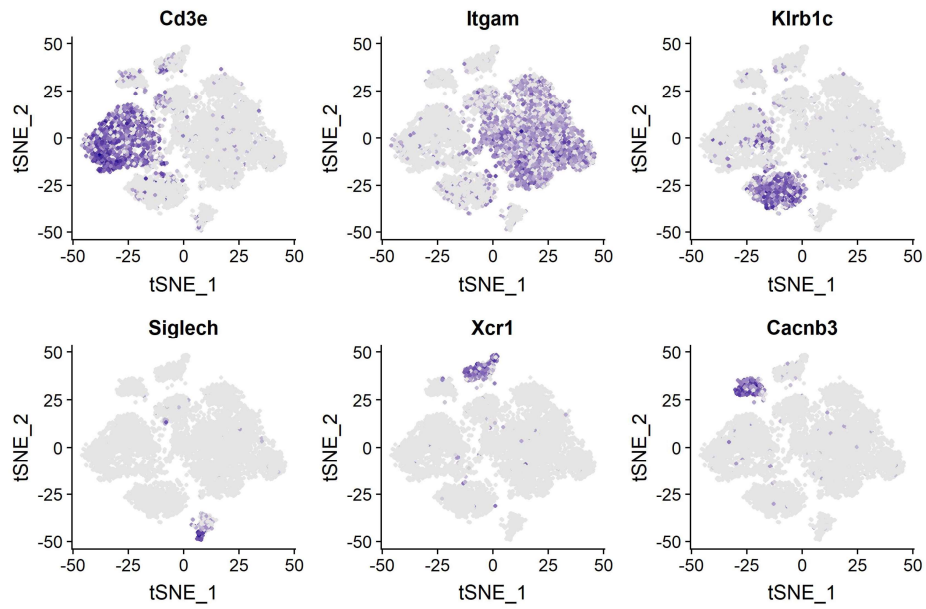

**Figure S2 – Lineage markers reveal main cell clusters in SCseq.** Visualization of select immune-related genes in t-SNE plots identifies broad cell clusters. *CD3e*, *Itgam*, *Klrb1c*, *Siglech*, *Xcr1*, and *Cacnb3* marks T cells, myeloid subsets, NK cells, plasmacytoid DCs, Xcr1+ DCs, and Langerhans cells respectively.

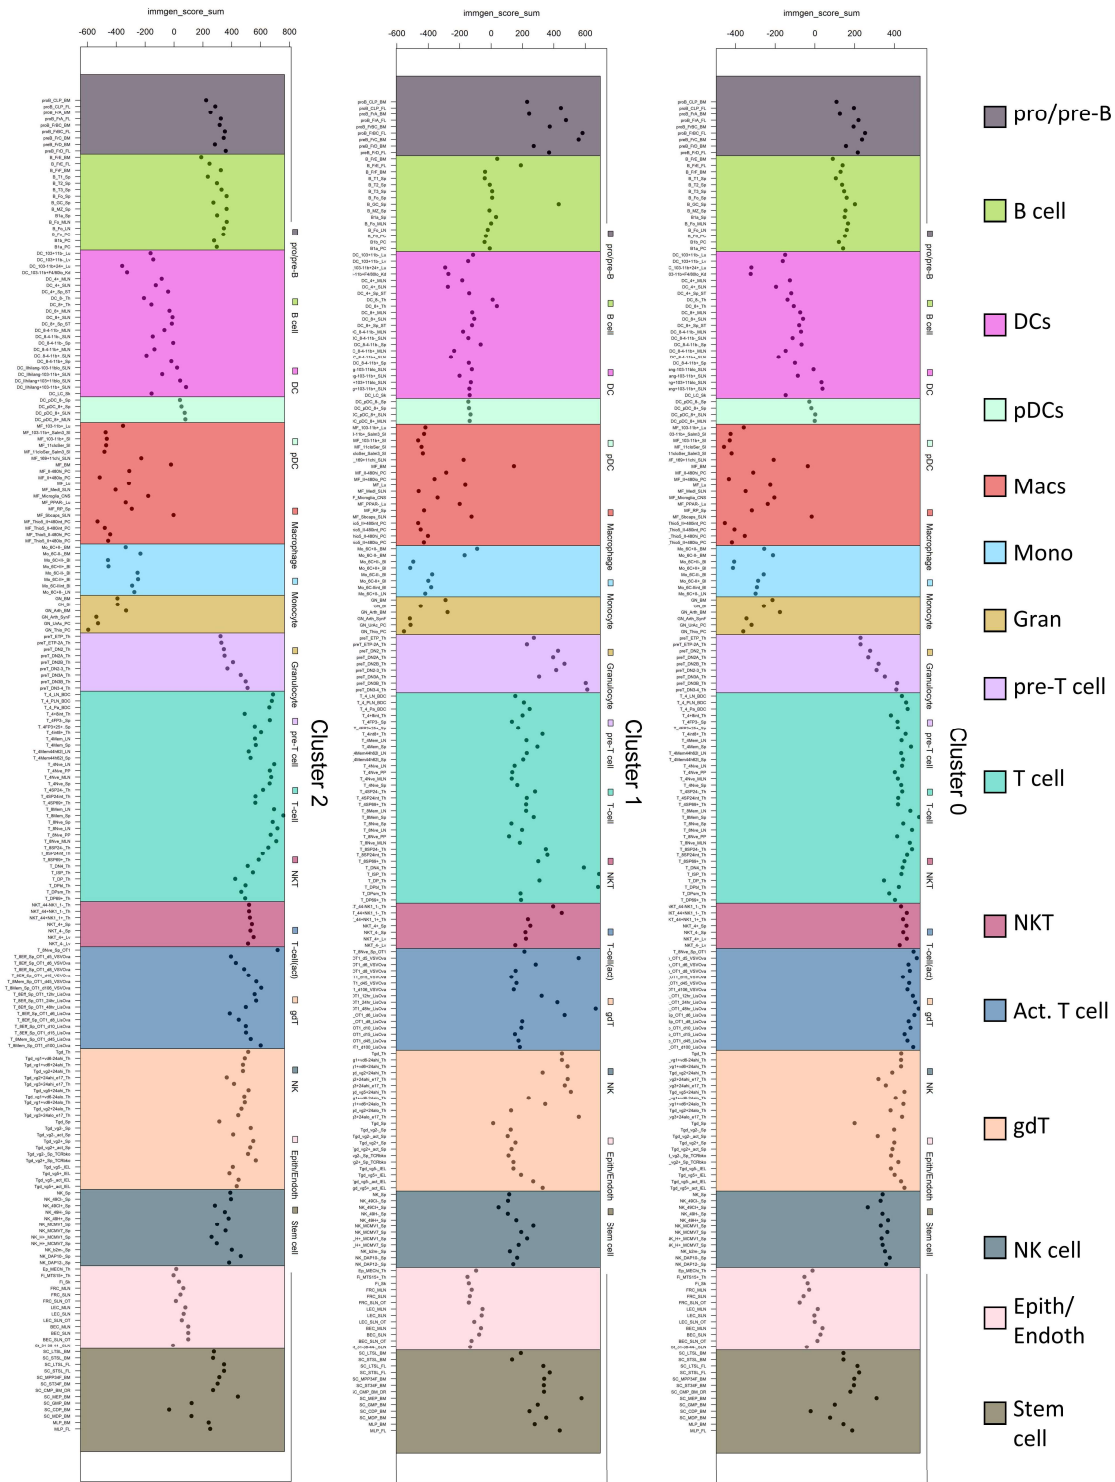

**Figure S3 – A novel identity scoring algorithm assists in naming SCseq clusters.** The output of immune cell scoring algorithm for each cluster is shown (see Methods). On the x-axis, ~200 cell subsets from the ImmGen database are listed. Y-axis indicates an aggregate score for each ImmGen subset for the cluster in the analysis. Graphs show the immune cell scores for each cluster in the SCseq data (Clusters 0-14 pre-naming). Top 5 highest scoring ImmGen subsets from these plots were plotted in Figure S4.

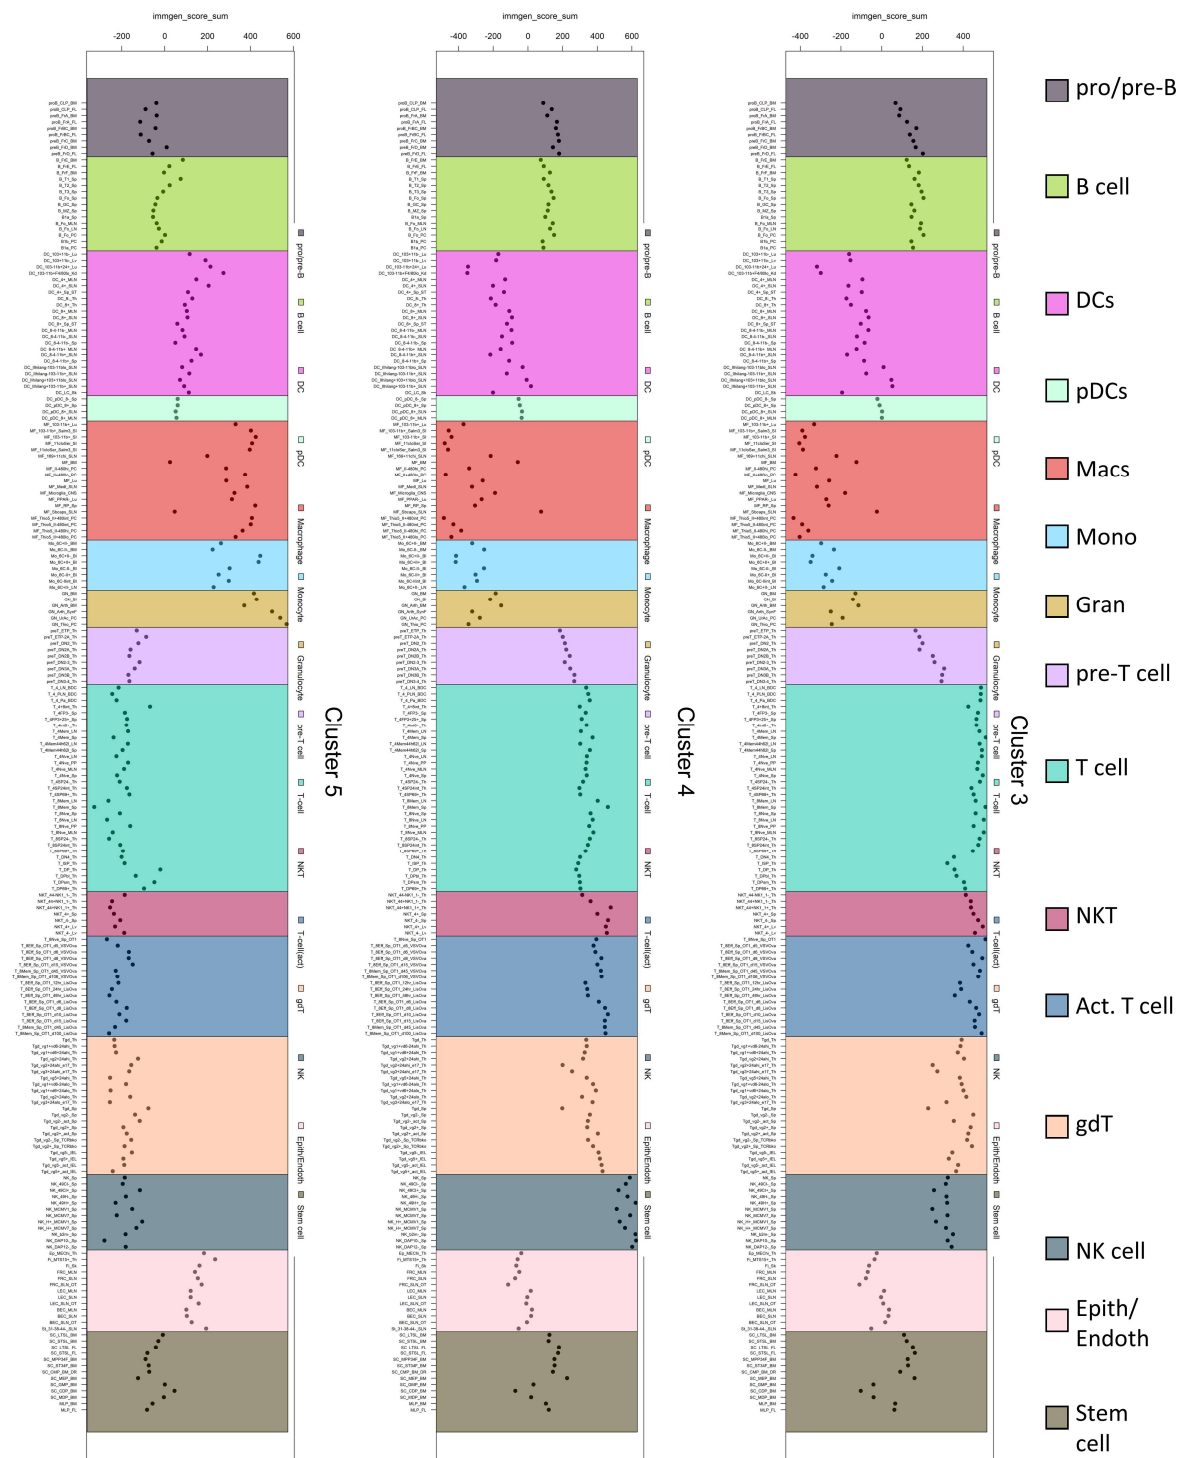

Figure S3 (cont'd)

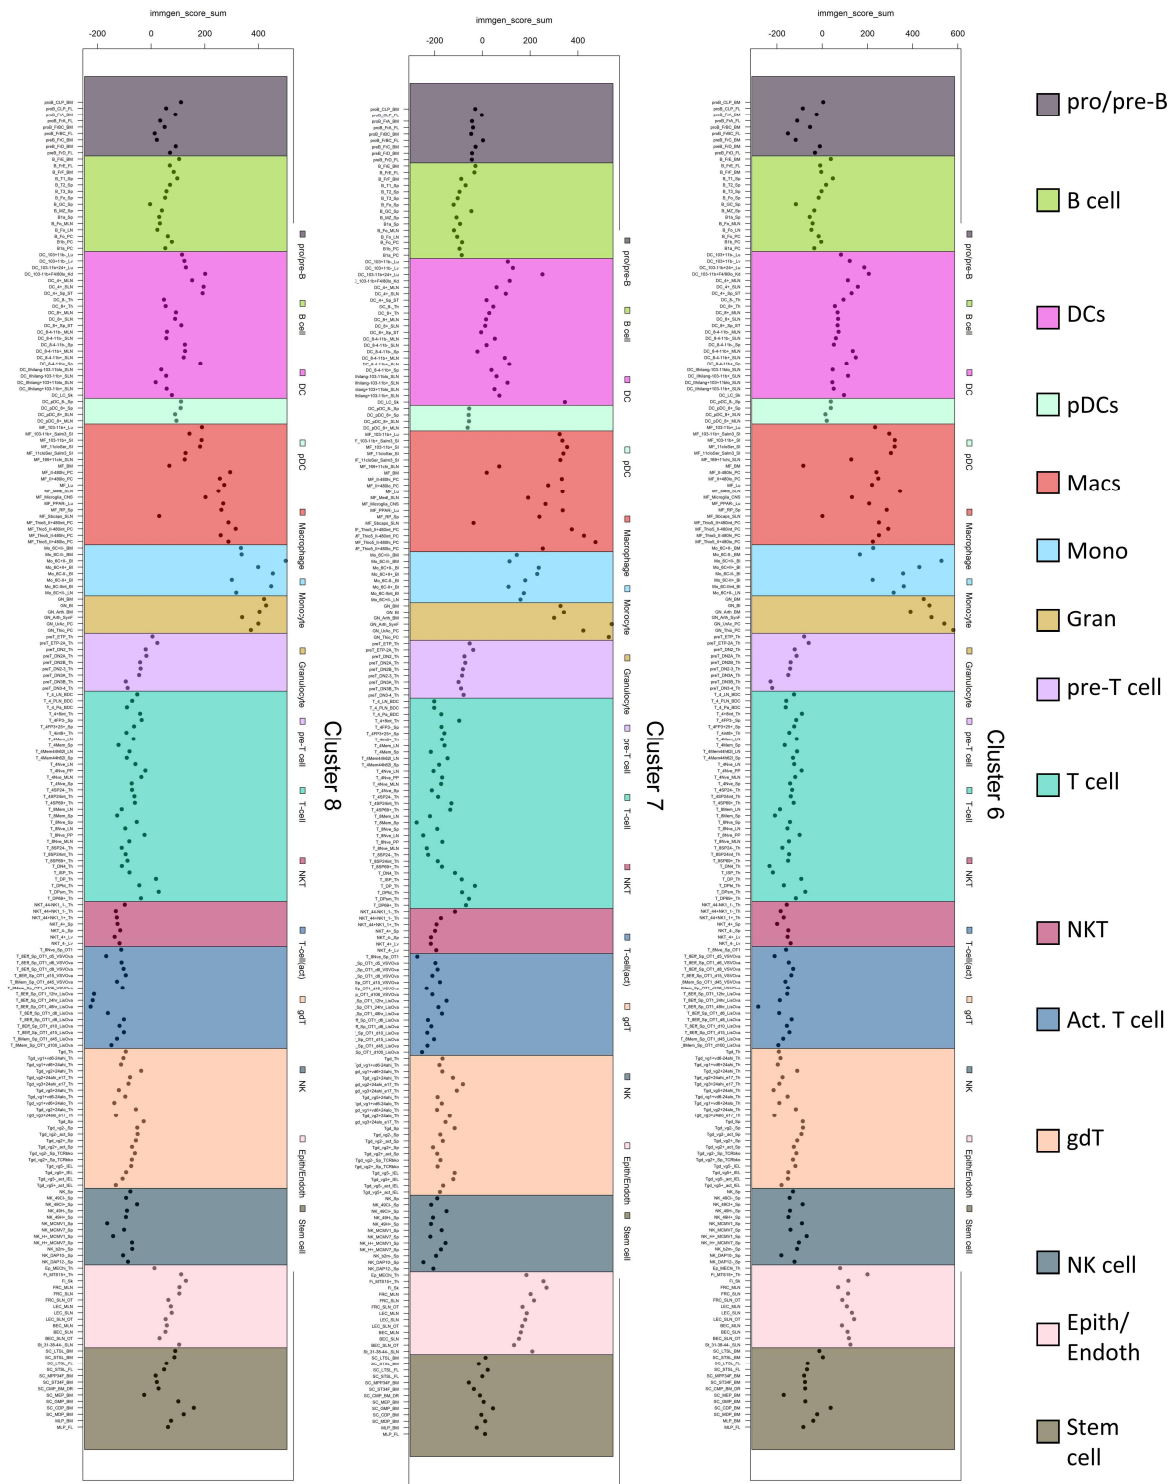

Figure S3 (cont'd)

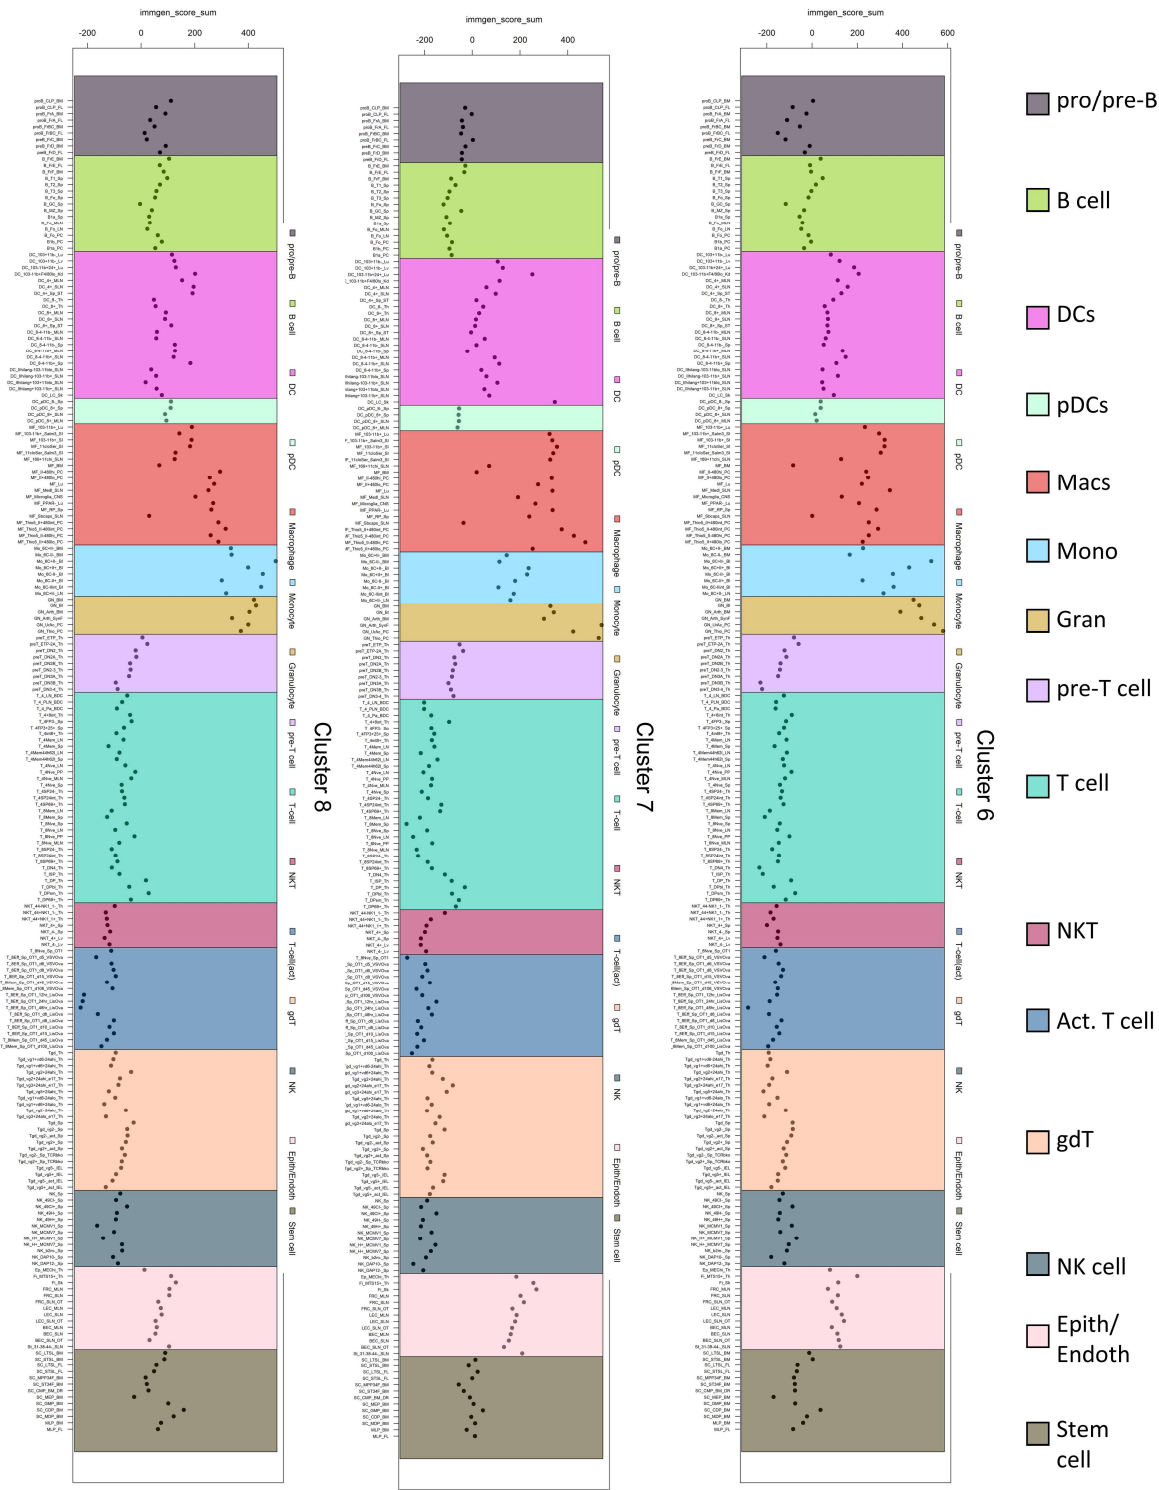

Figure S3 (cont'd)

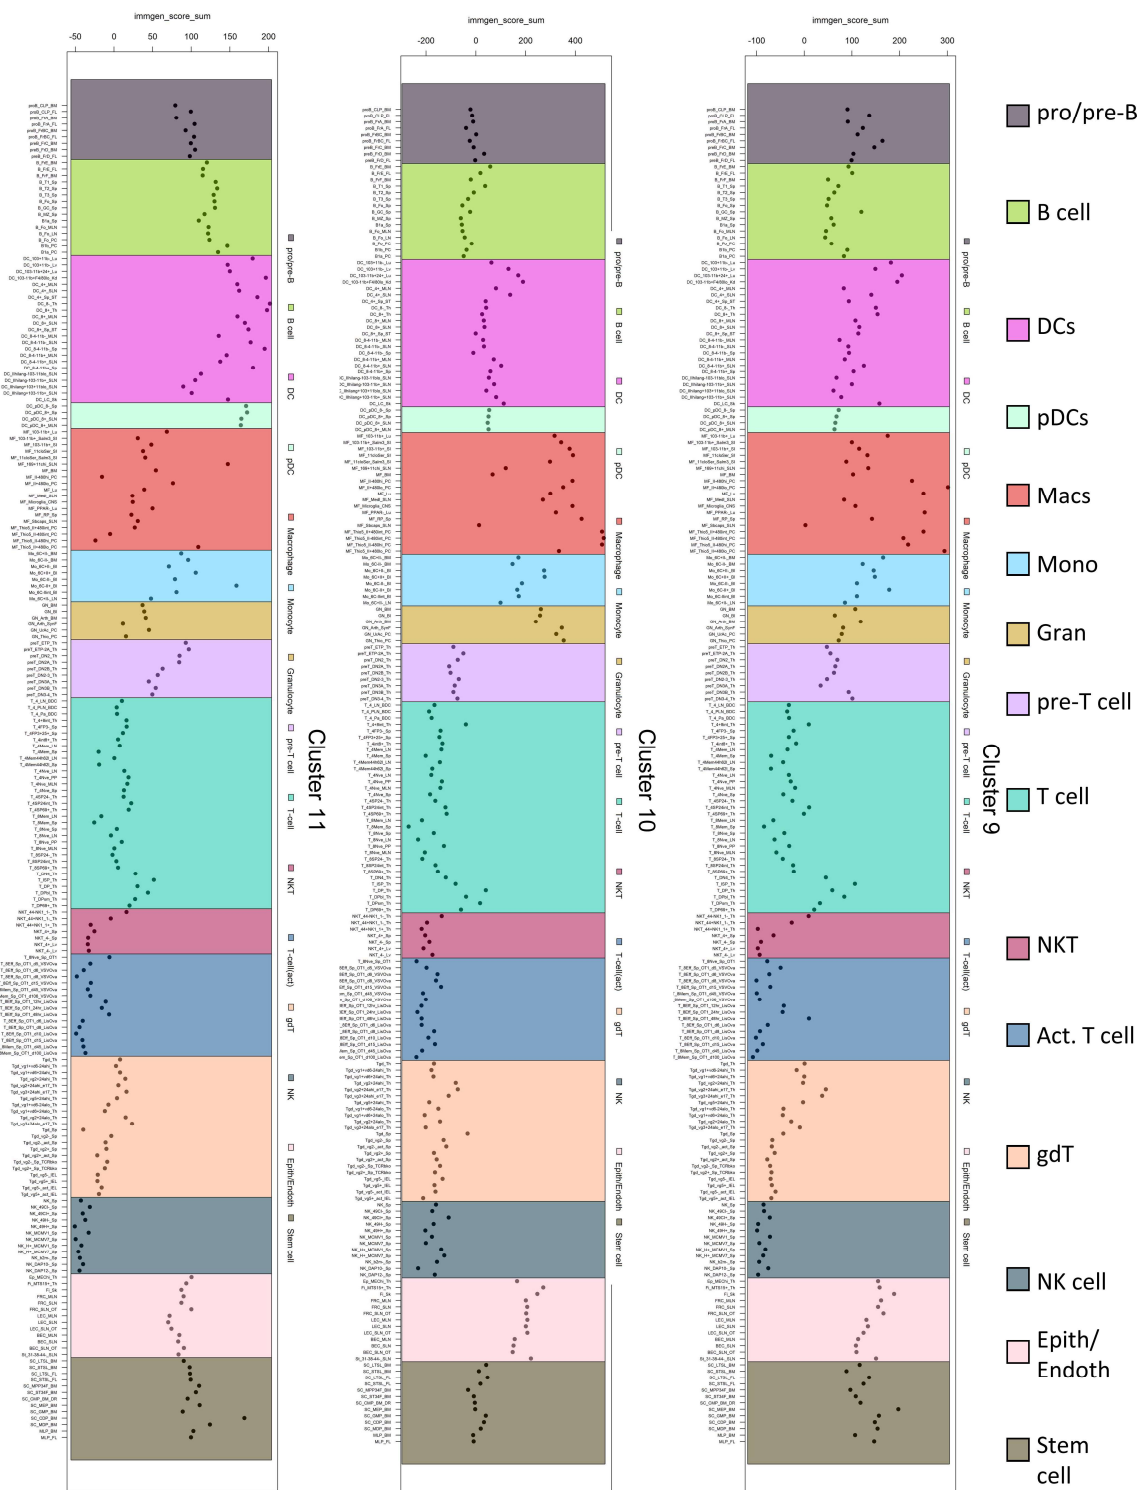

Figure S3 (cont'd)

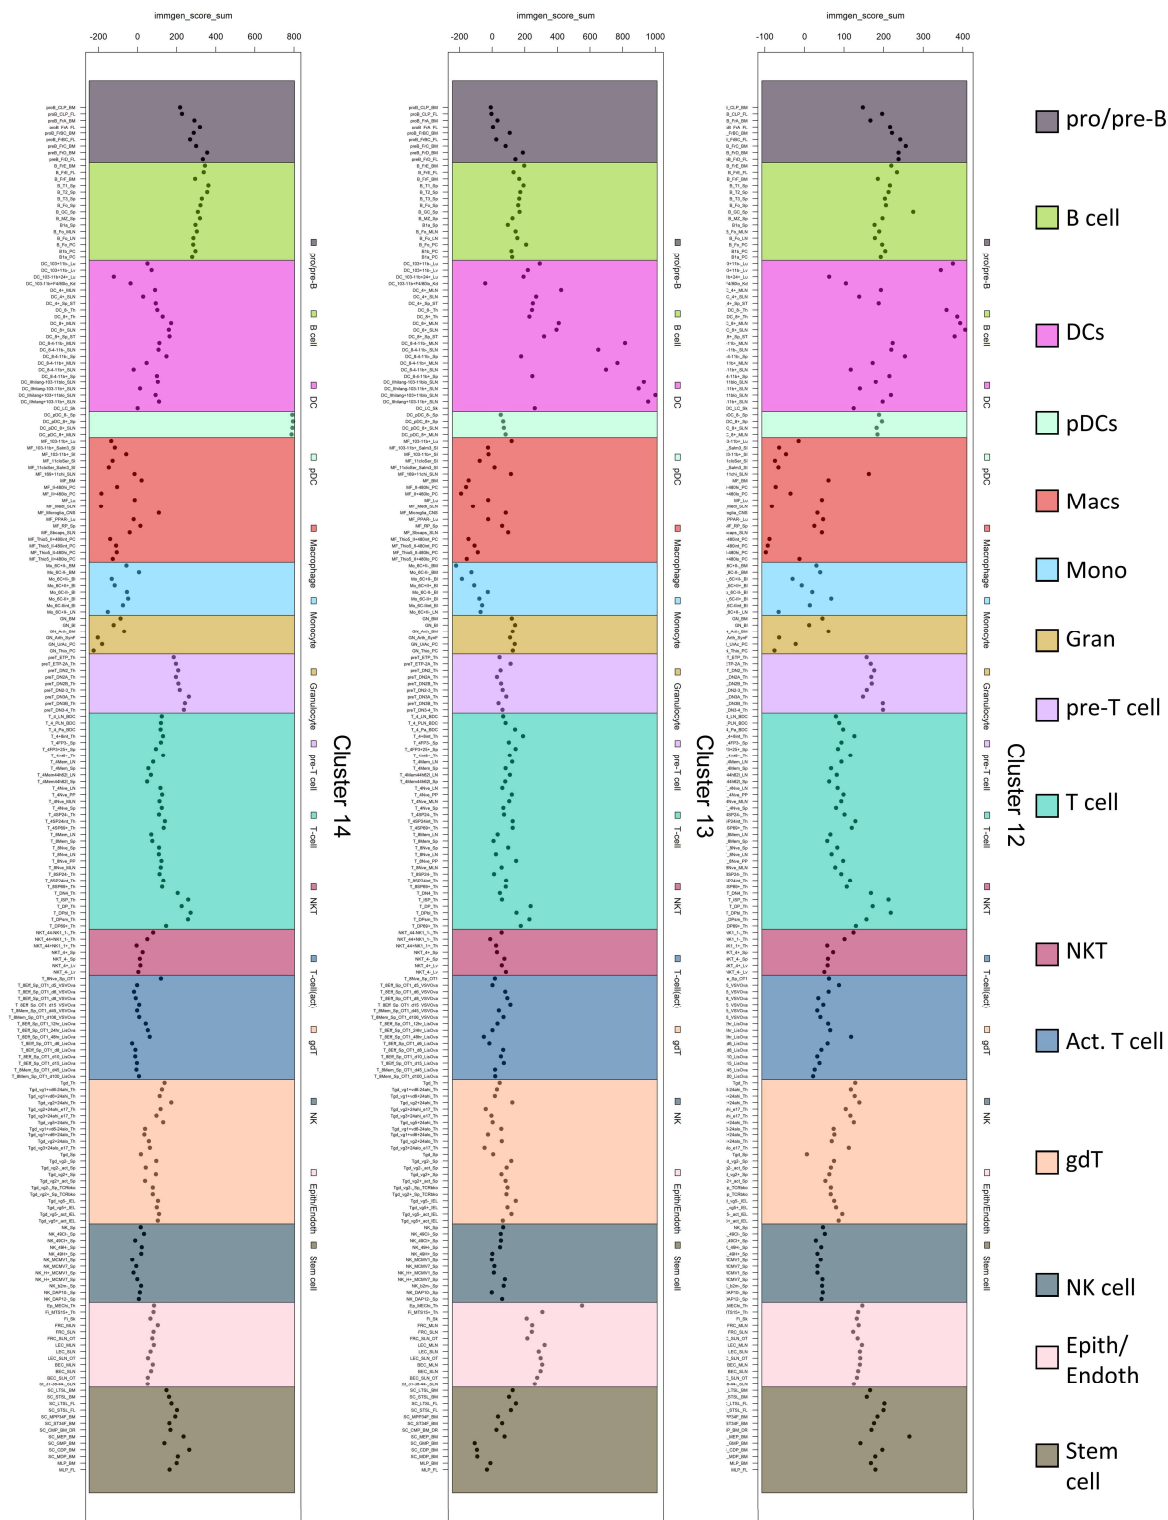

Figure S3 (cont'd)

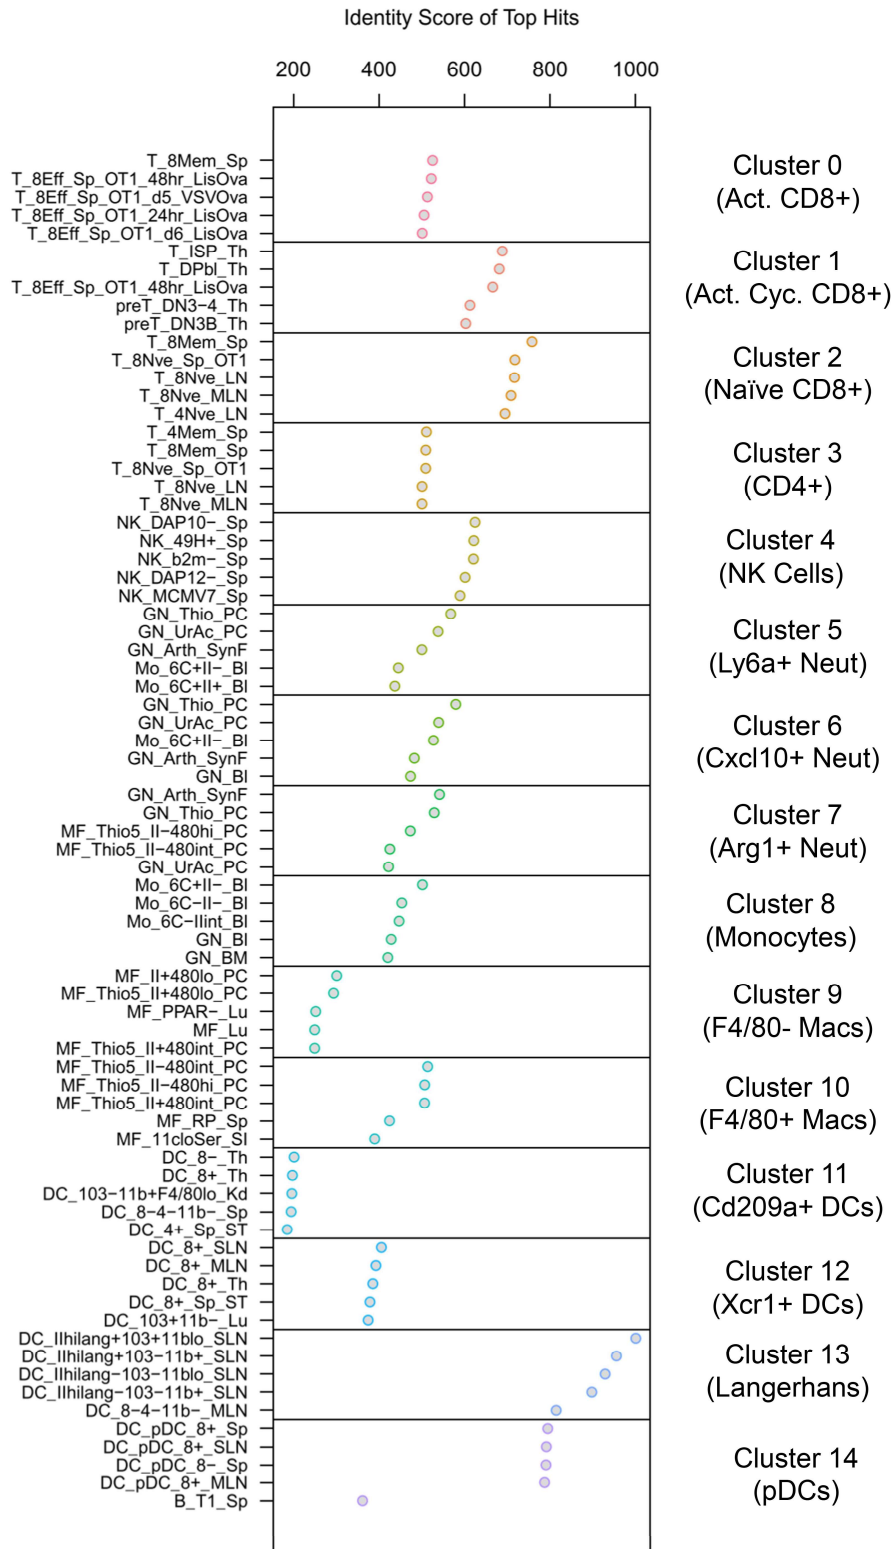

**Figure S4 – Summary of top hits for each cluster calculated by identity scoring algorithm.** Summary output of our immune cell scoring algorithm. Top 5 highest scoring immune cell subsets from the ImmGen database were plotted for each cluster. Clusters 0 to 13 were named as indicated by the help of this algorithm and differential expression analyses between closely related clusters.

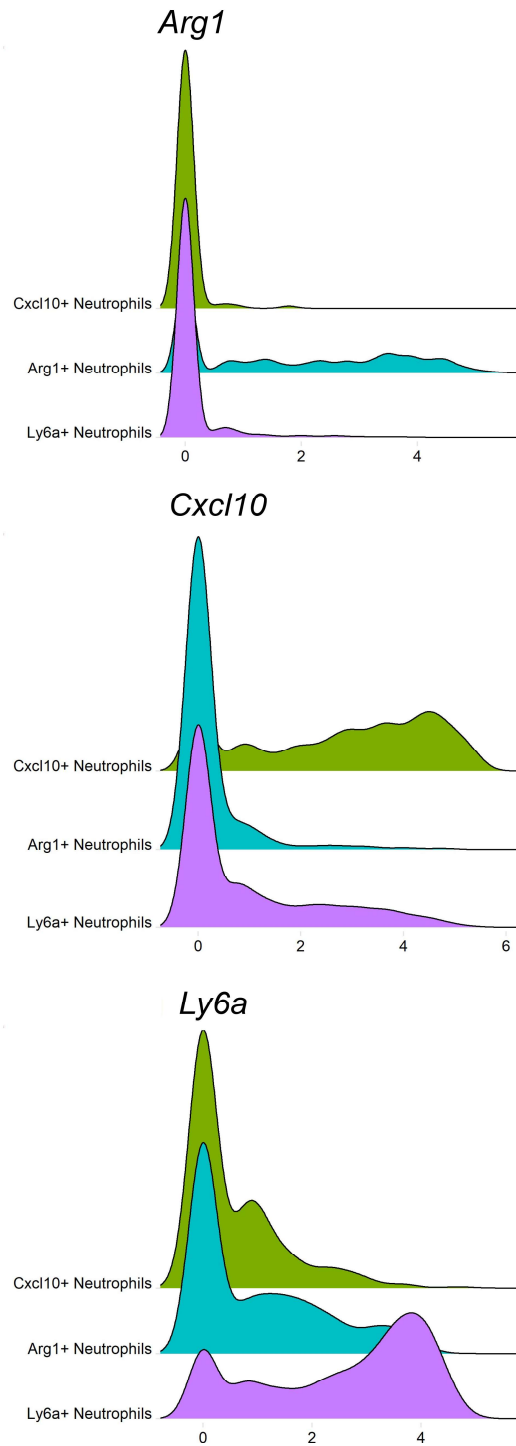

**Figure S5 – Closely related neutrophil subsets can be distinguished based on differential gene expression.** Expression of *Arg1*, *Cxcl10*, and *Ly6a* in three neutrophil clusters are shown. For this graph, data from WT and miR-155 TCKO samples on days 9 and 12 were combined. These genes are selected to distinguish neutrophil subsets since they showed a differential expression profile.

Differential expression analysis on day 9 between WT  
and miR-155 TCKO Activated CD8+ clusters  
(adj.p<0.05, >2 fold changing genes)

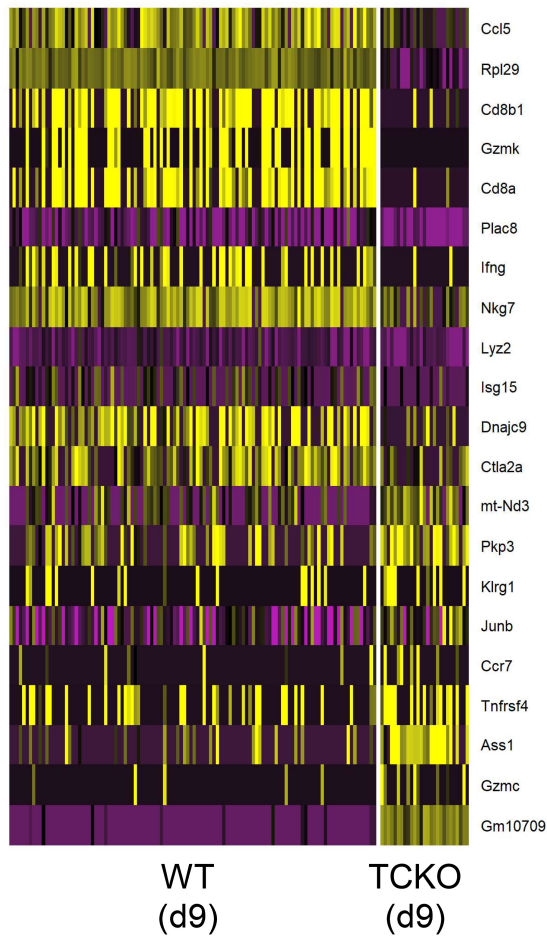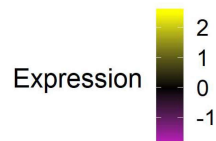

Differential expression analysis on day 12 between WT  
and miR-155 TCKO Activated CD8+ clusters  
(adj.p<0.05, >2 fold changing genes)

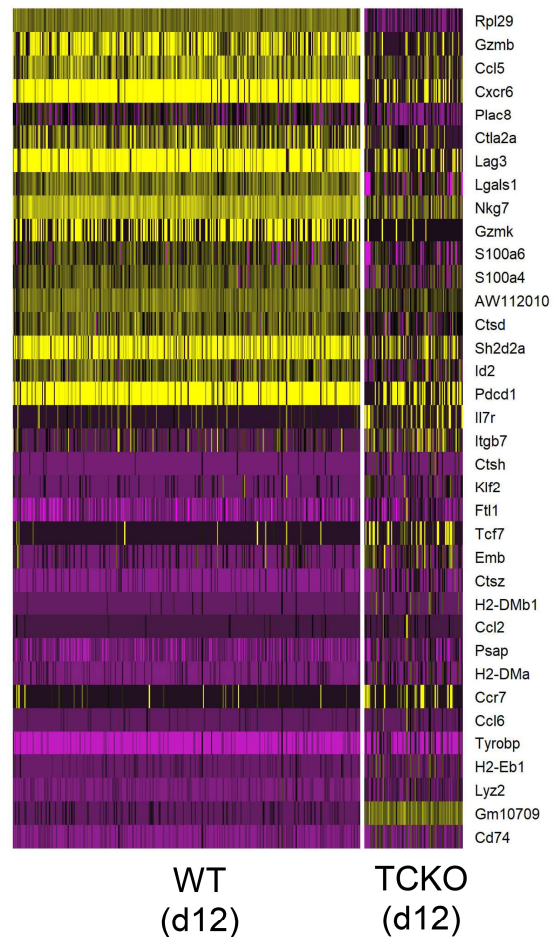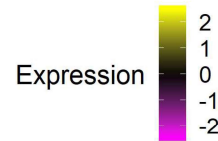

**Figure S6 – Differential gene expression in activated CD8+ T cell clusters.** Heatmaps showing differentially expressed genes in Activated CD8+ T cell clusters. WT and miR-155 TCKO samples were compared on days 9 and 12 separately. Genes shown in the heatmaps met the cut-off criteria of adjusted p-value of <0.05 and >2 linear fold-change.

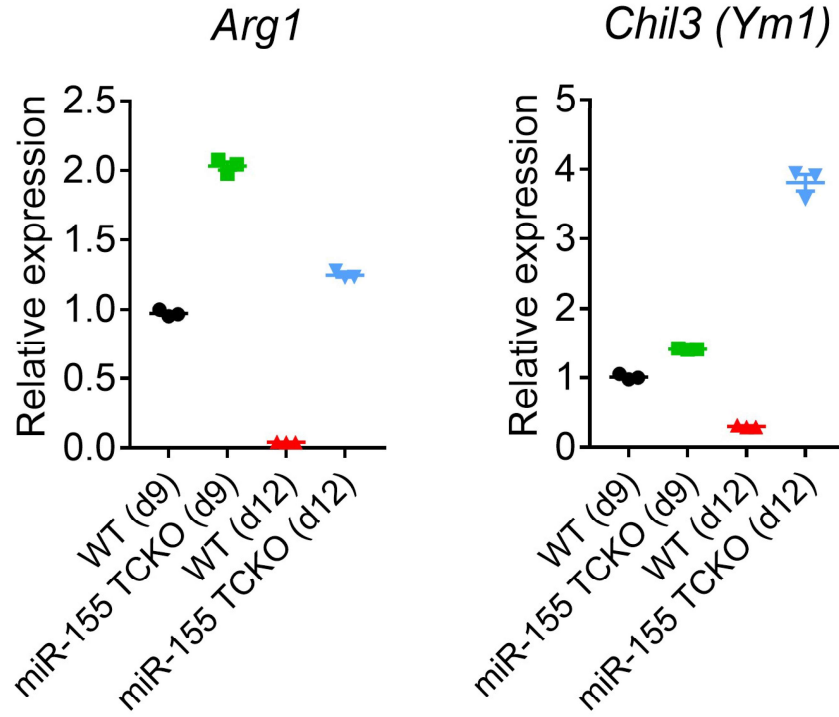

**Figure S7 – qPCR validation of *Arg1* and *Chil3* differential expression.** Plots validate the gene expression changes observed in SCseq data. For this experiment, RNA from sorted CD45+ tumor infiltrating leukocytes was used (pooled from 4 mice as indicated in Figure 1a, and in Methods section). qPCR reaction was performed in triplicates and each point indicates a technical replicate.

**A****Day 9 CD11b+F480+ (WT vs miR-155TCKO)**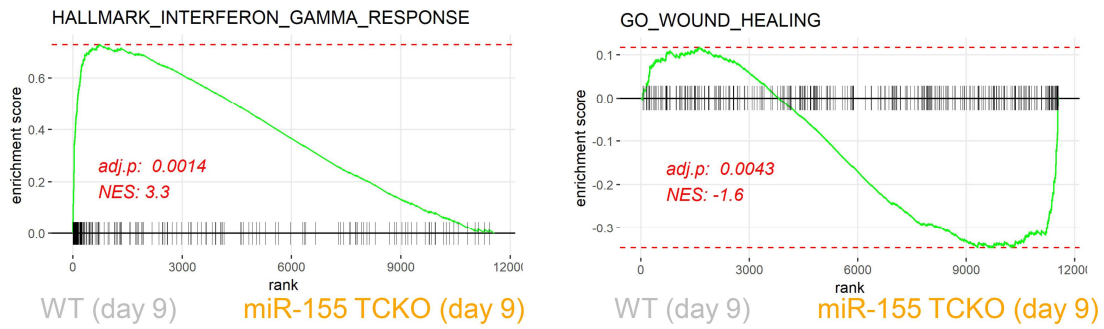**B****WT CD11b+F480+ (Day 9 vs Day 12)**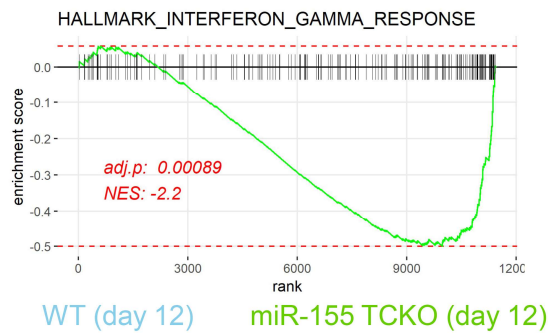

**Figure S8 – GSEA of CD11b+F4/80+ macrophages in the TME. A.** Comparison of WT and miR-155 TCKO macrophages on day 9 revealed an enrichment of IFN $\gamma$  response genes in WT samples and enrichment of wound healing genes in miR-155 TCKO counterparts. **B.** Comparison of gene set enrichment in WT macrophages between days 9 and 12 revealed an enrichment of IFN $\gamma$  response signature at the later time point suggesting an evolving antitumor immune response over time. Normalized enrichment score (NES) and adjusted p values are shown.

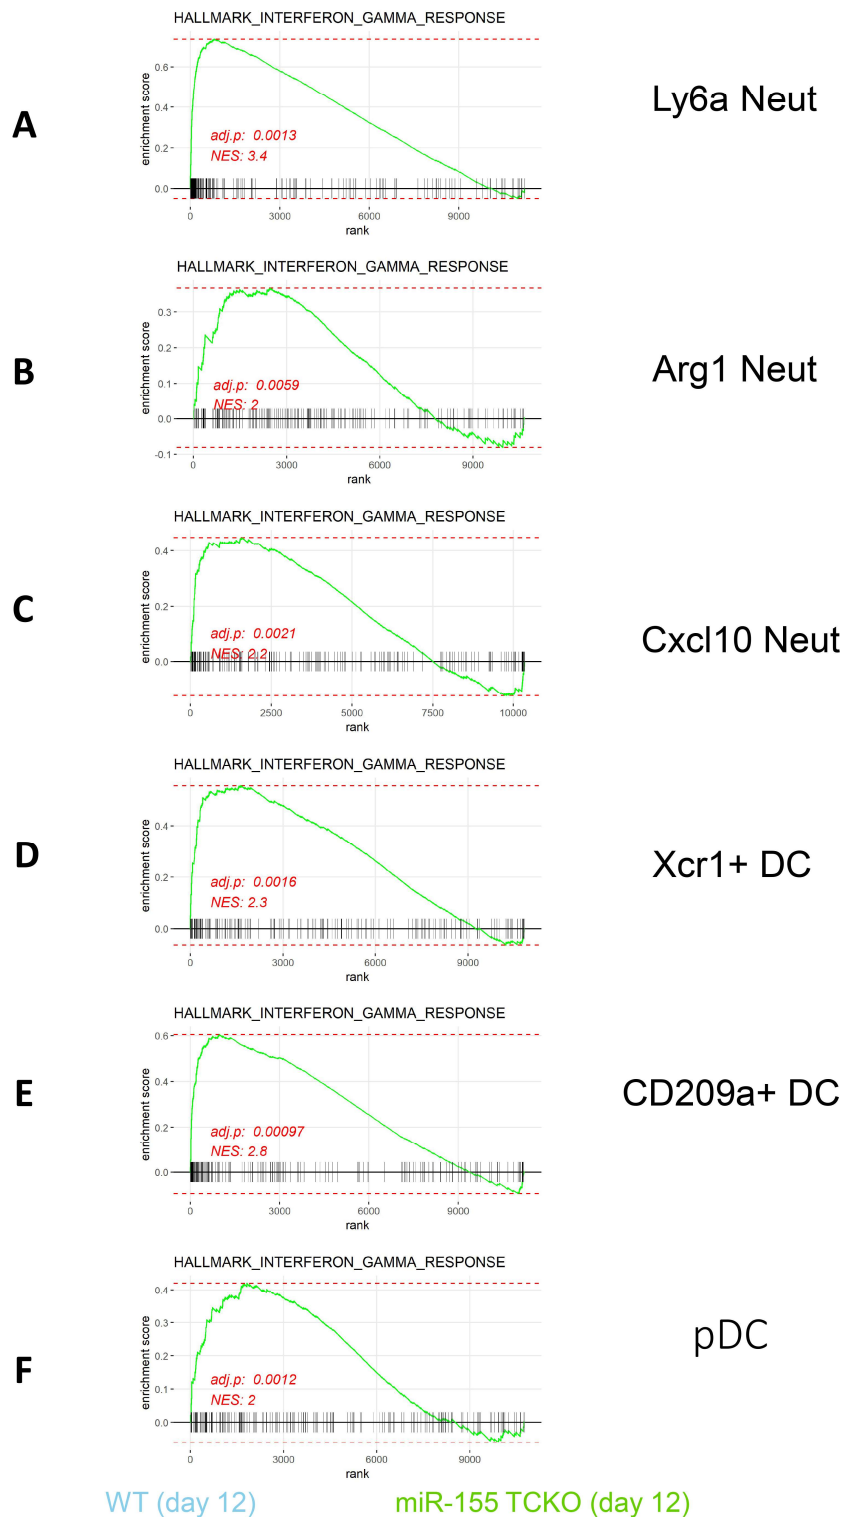

**Figure S9 – IFN $\gamma$  response signature is enriched in multiple other myeloid cells in the WT TME.** Significant enrichment was observed for **A.** Ly6a $^{+}$  neutrophils, **B.** Arg1 $^{+}$  neutrophils, **C.** Cxcl10 $^{+}$  neutrophils, **D.** Xcr1 $^{+}$  DCs, **E.** CD209a $^{+}$  DC, and **F.** pDCs. Data shown are derived from day 12. Normalized enrichment score (NES) and adjusted p values are shown.

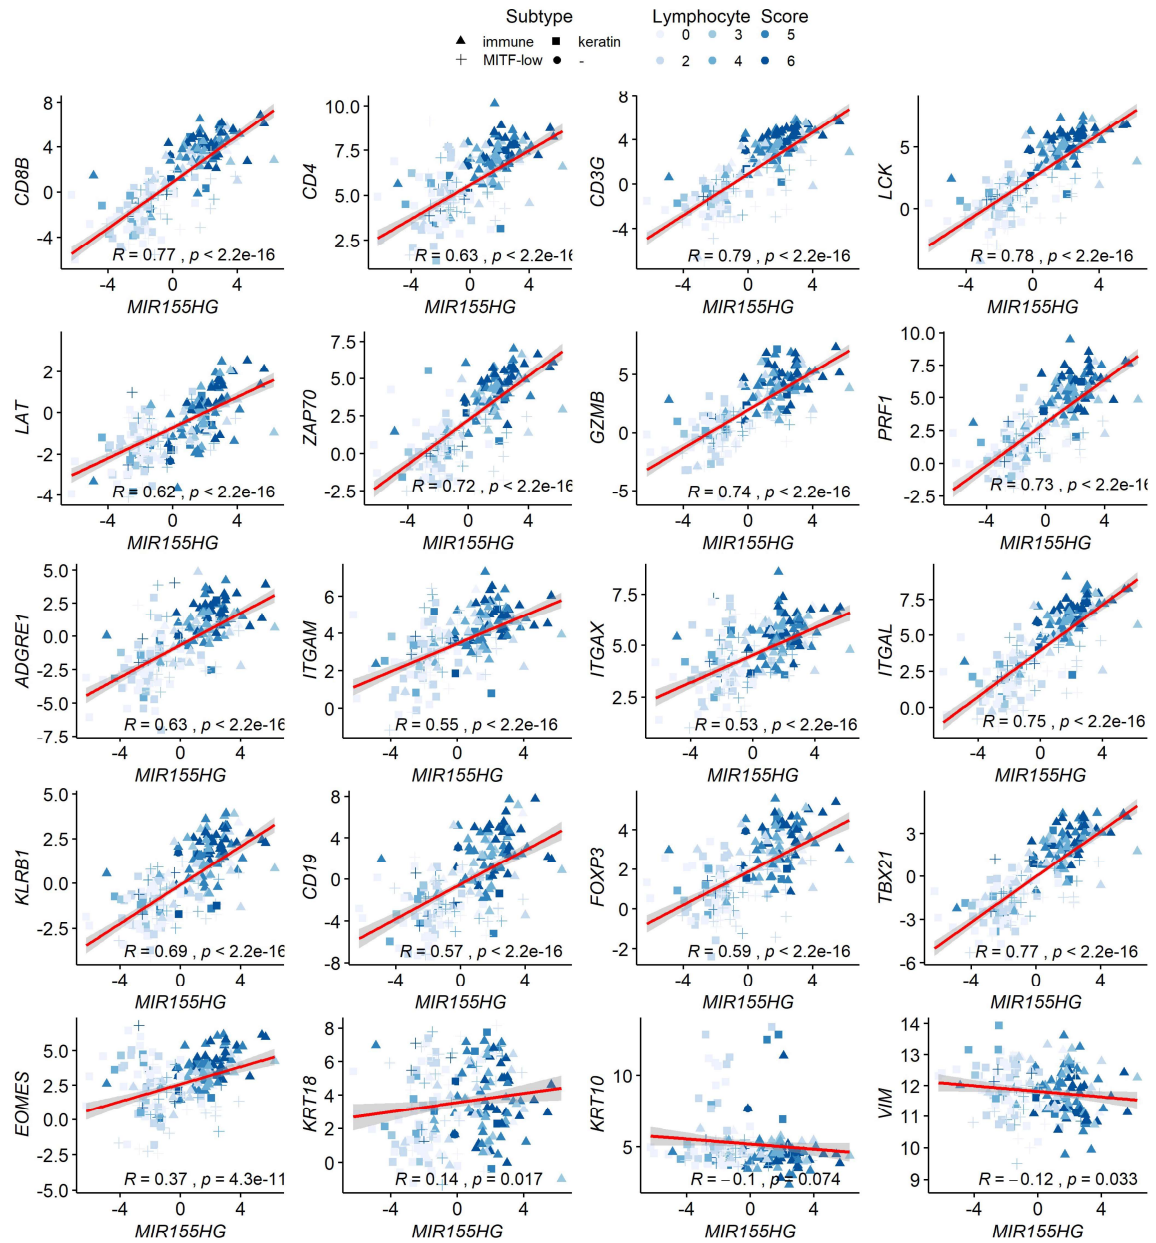

**Figure S10 – *MIR155HG* expression correlates with immune-associated genes.** Scatter plots showing the positive correlation between miR-155 host gene (*MIR155HG*) and immune-associated gene expression in TCGA-SKCM. Color gradient indicates the lymphocyte infiltration score of tumors, and the symbol shape indicates the molecular subtype of tumors (▲ Immune; ■ Keratin; + MITF-low; ● Uncategorized)

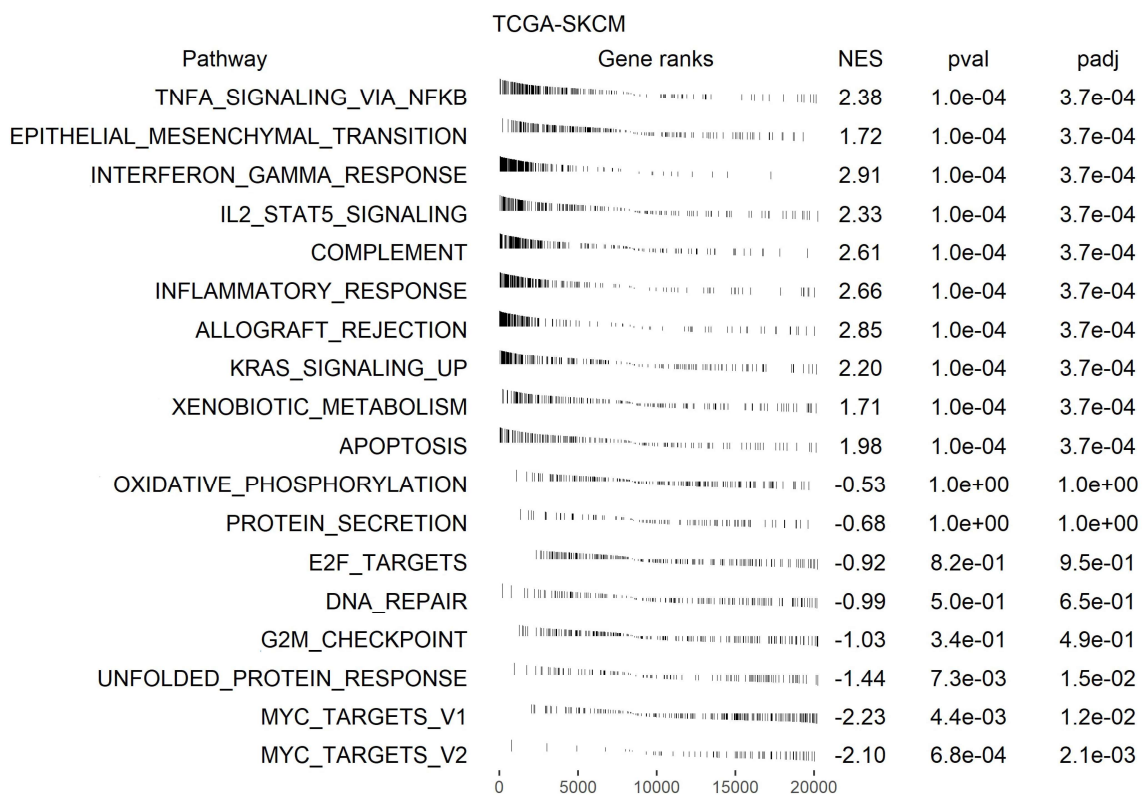

hsa-mir-155 high (SKCM) ↔ hsa-mir-155 low (SKCM)

**Figure S11 – Summary of GSEA analysis in TCGA-SKCM tumor subsets.** Top 10 highly enriched gene sets in miR-155-high (left) and miR-155-low (right) subsets of SKCM tumors. Multiple immune pathways are enriched in miR-155-high tumor subsets whereas proliferative pathways were enriched in miR-155-low subsets.



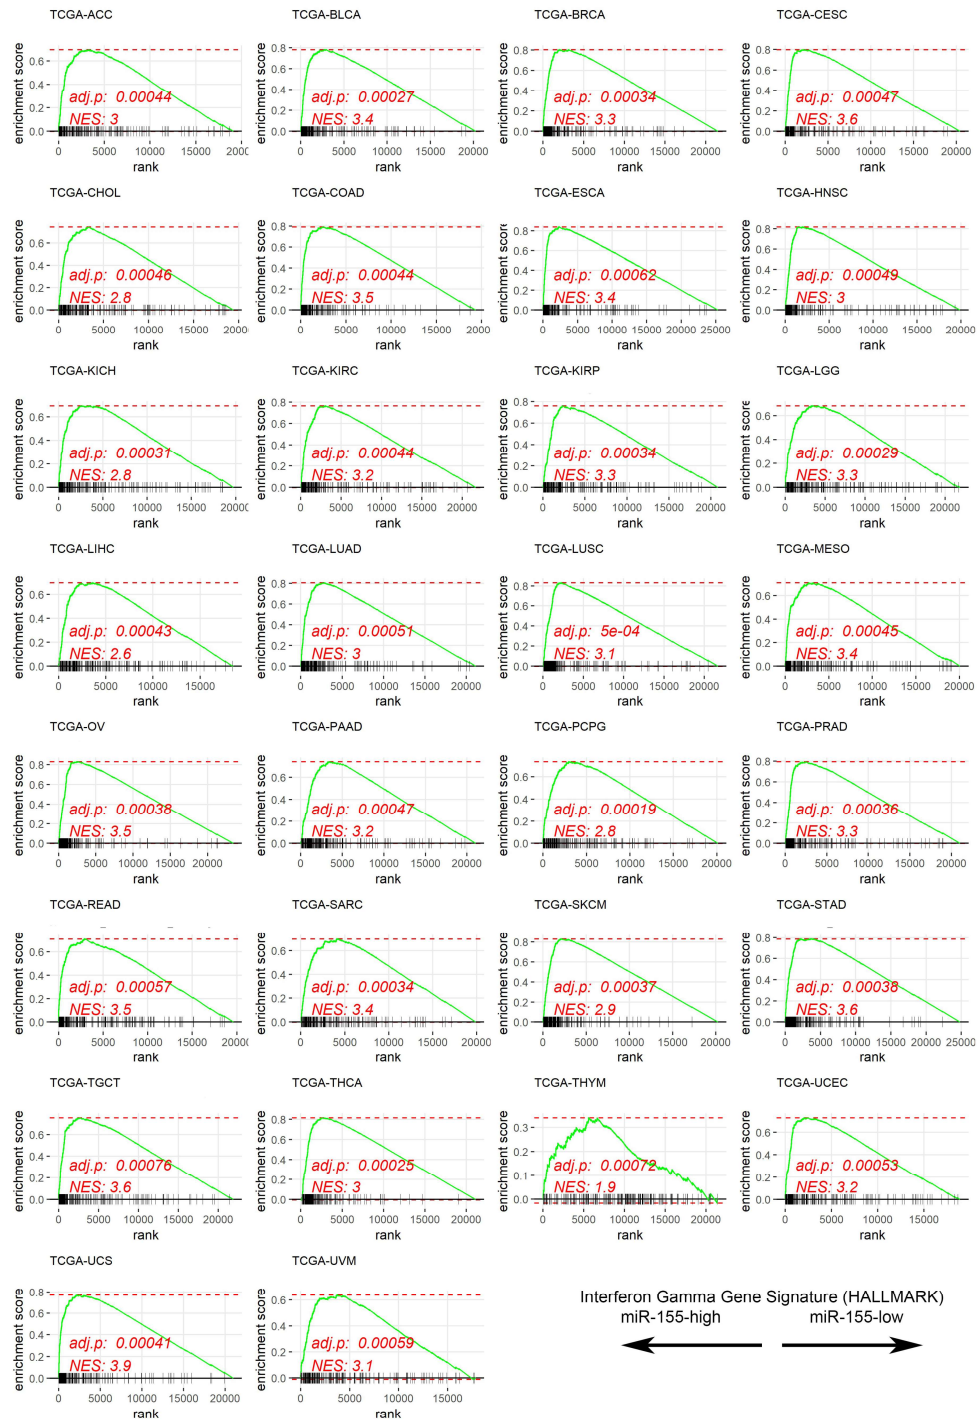

**Figure S13 – miR155 expression in solid tumors is associated with an IFN $\gamma$  response signature.** Analysis of the IFN $\gamma$  response gene signature in miR-155-high tumor subsets across TCGA cohorts. miR-155-high subsets of TCGA tumors (left side of the plot) were consistently defined by an enrichment of IFN $\gamma$  response signature suggesting an active immune component in the TME. Normalized enrichment score (NES) and adjusted p values are shown.

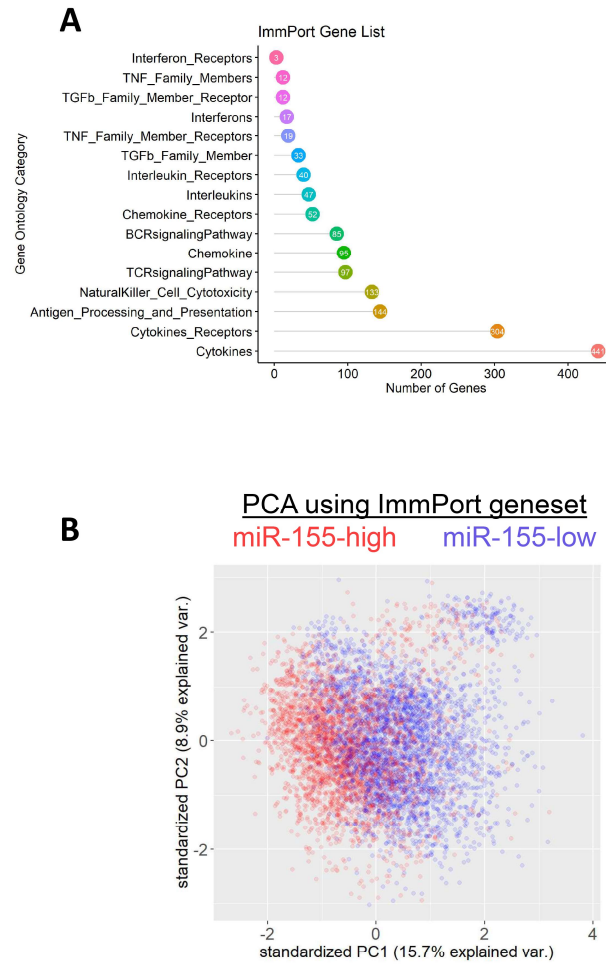

**Figure S14 –Principal component analyses of gene expression in TCGA tumor cohorts. A.** Gene class annotations of immune-related genes downloaded from the ImmPort database. **B.** PCA analysis of aggregated TCGA tumor cohorts using ImmPort genes (544 genes in analysis). Spatial separation of miR-155-high (red) tumors indicate miR-155 expression marks a similar immune gene expression profile among TCGA cancers.

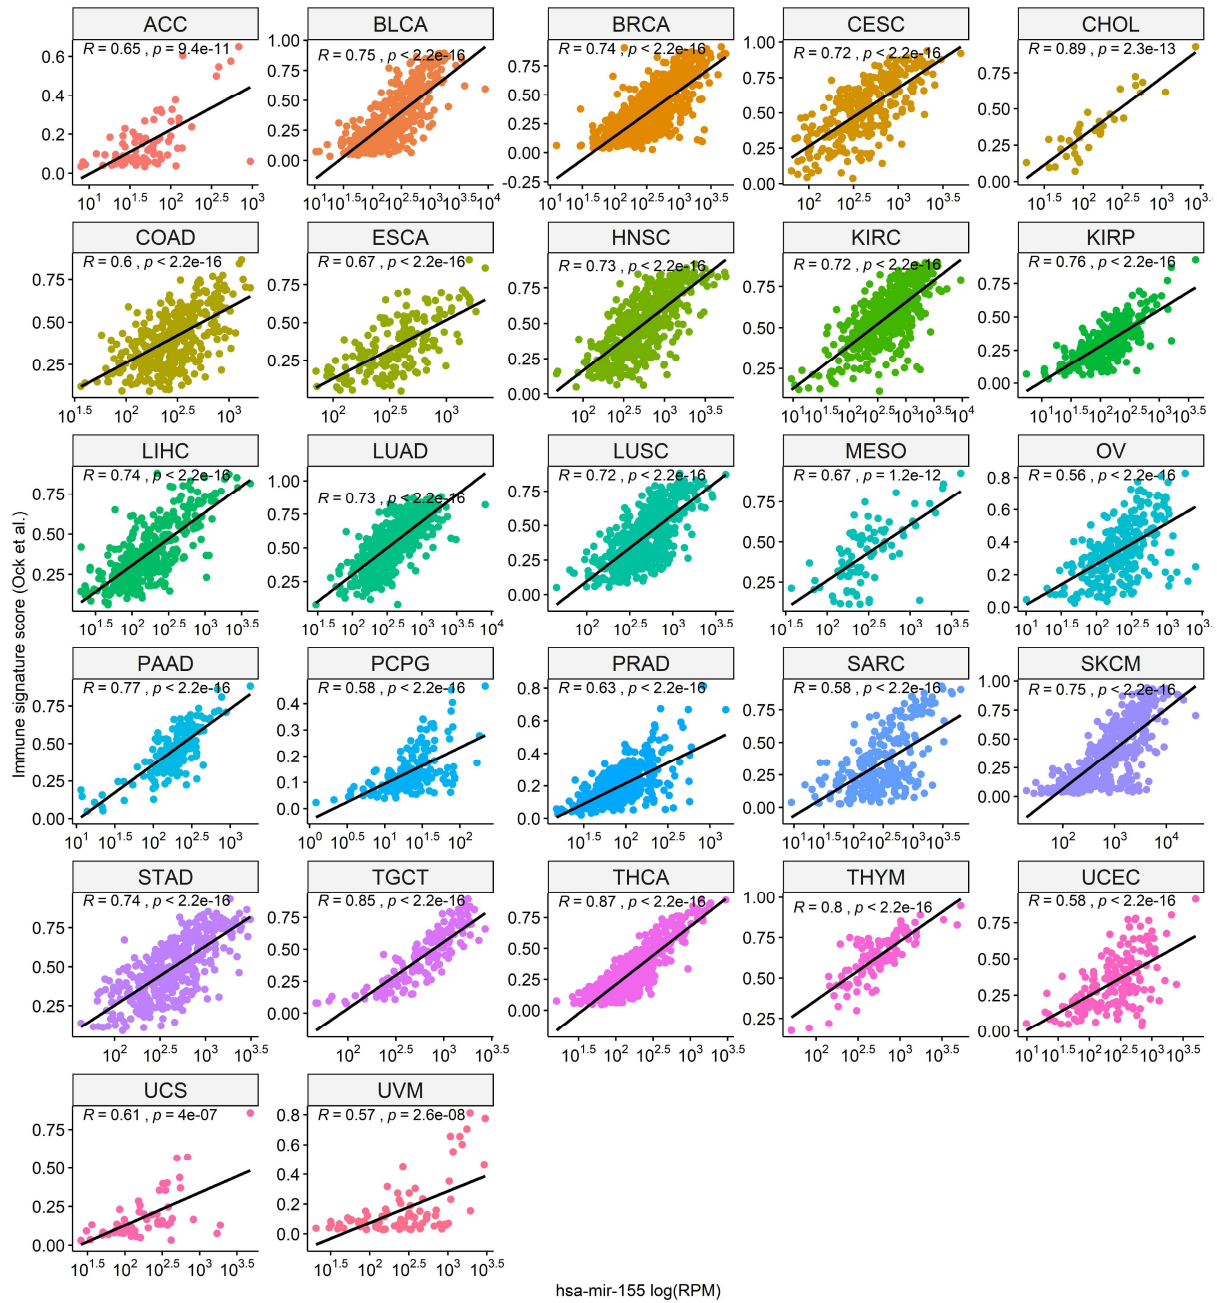

**Figure S15 – miR-155 expression correlates with a predictor of immunotherapy response.** miR-155 expression is strongly correlated with an immune signature score (IS score) (Ock et al. (1)) that predicts immunotherapy response. BLCA, Bladder Urothelial Carcinoma; LGG, Brain Lower Grade Glioma; BRCA, Breast invasive carcinoma; CESC, Cervical squamous cell carcinoma and endocervical adenocarcinoma; CHOL, Cholangiocarcinoma; COAD, Colon adenocarcinoma; ESCA, Esophageal carcinoma; HNSC, Head and Neck squamous cell carcinoma; KICH, Kidney Chromophobe; KIRC, Kidney renal clear cell carcinoma; KIRP, Kidney renal papillary cell carcinoma; LIHC, Liver hepatocellular carcinoma; LUAD, Lung adenocarcinoma; LUSC, Lung squamous cell carcinoma; MESO, Mesothelioma; OV, Ovarian serous cystadenocarcinoma; PAAD, Pancreatic adenocarcinoma; PCPG, Pheochromocytoma and Paraganglioma; PRAD, Prostate adenocarcinoma; READ, Rectum adenocarcinoma; SARC, Sarcoma; SKCM, Skin Cutaneous Melanoma; STAD, Stomach adenocarcinoma; TGCT, Testicular Germ Cell Tumors; THYM, Thymoma; THCA, Thyroid carcinoma; UCS, Uterine Carcinosarcoma; UCEC, Uterine Corpus Endometrial Carcinoma; UVM, Uveal Melanoma.

## Example KM curves

Exclusion criterion 1: Less than 100 patients in the study (UVM, UCS, CHOL, ACC, MESO)

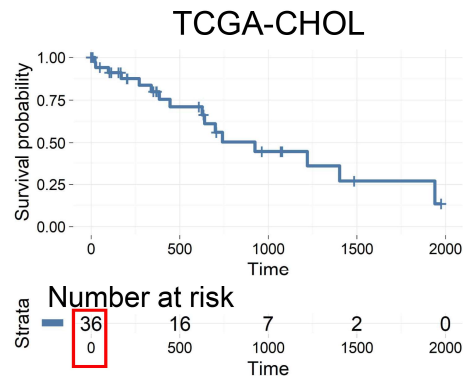

Exclusion criterion 2: Lack of a consistent decline in survival over time (PCPG, PRAD, TGCT, THCA, KICH)

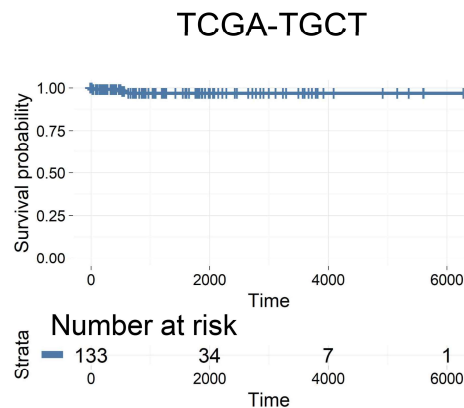

Datasets in analysis: BRCA, BLCA, CESC, COAD, ESCA, HNSC, KIRC, KIRP, LGG, LIHC, LUAD, LUSC, OV, PAAD, READ, SARC, STAD, SKCM, THYM, UCEC

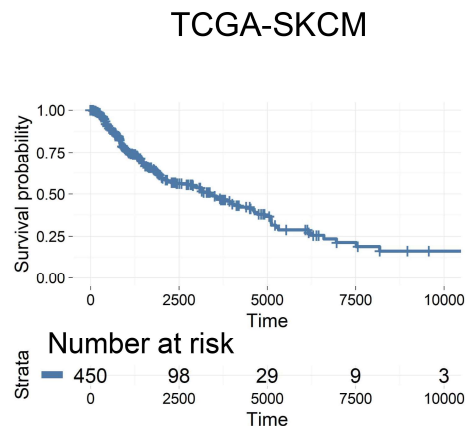

**Figure S16 – Diagram showing the approach for including and excluding TCGA samples.** The inclusion criteria for the analysis in Figure 6f are shown. Tumor types typed in red were excluded due to low (<100) numbers of patients or due to lack of a time-dependent decline in survival as evidenced by the uncategorized Kaplan-Meier (KM) curves. BLCA, Bladder Urothelial Carcinoma; LGG, Brain Lower Grade Glioma; BRCA, Breast invasive carcinoma; CESC, Cervical squamous cell carcinoma and endocervical adenocarcinoma; CHOL, Cholangiocarcinoma; COAD, Colon adenocarcinoma; ESCA, Esophageal carcinoma; HNSC, Head and Neck squamous cell carcinoma; KICH, Kidney Chromophobe; KIRC, Kidney renal clear cell carcinoma; KIRP, Kidney renal papillary cell carcinoma; LIHC, Liver hepatocellular carcinoma; LUAD, Lung adenocarcinoma; LUSC, Lung squamous cell carcinoma; MESO, Mesothelioma; OV, Ovarian serous cystadenocarcinoma; PAAD, Pancreatic adenocarcinoma; PCPG, Pheochromocytoma and Paraganglioma; PRAD, Prostate adenocarcinoma; READ, Rectum adenocarcinoma; SARC, Sarcoma; SKCM, Skin Cutaneous Melanoma; STAD, Stomach adenocarcinoma; TGCT, Testicular Germ Cell Tumors; THYM, Thymoma; THCA, Thyroid carcinoma; UCS, Uterine Carcinosarcoma; UCEC, Uterine Corpus Endometrial Carcinoma; UVM, Uveal Melanoma

| Tumor | Mean<br>miR-155<br>(log) | Cohort<br>Size | Median<br>Mutations<br>(log) | Mutations<br>per Mb<br>(log) | Hazard<br>Ratio | Lower<br>95% C.I.<br>of HR | Upper<br>95% C.I.<br>of HR | Coef. | Std Err<br>(coef) | Z-score | Pr(> z ) |
|-------|--------------------------|----------------|------------------------------|------------------------------|-----------------|----------------------------|----------------------------|-------|-------------------|---------|----------|
| LGG   | 1.53                     | 511            | 2.94                         | -0.97                        | 2.49            | 2.08                       | 2.98                       | 0.91  | 0.09              | 9.87    | 0.000    |
| KIRC  | 2.86                     | 339            | 3.78                         | -0.13                        | 1.40            | 1.21                       | 1.63                       | 0.34  | 0.08              | 4.37    | 0.000    |
| SKCM  | 3.23                     | 758            | 5.72                         | 1.80                         | 0.84            | 0.76                       | 0.93                       | -0.18 | 0.05              | -3.43   | 0.001    |
| PAAD  | 2.36                     | 178            | 3.11                         | -0.80                        | 1.41            | 1.07                       | 1.85                       | 0.34  | 0.14              | 2.44    | 0.015    |
| CESC  | 2.78                     | 305            | 4.19                         | 0.28                         | 0.73            | 0.56                       | 0.95                       | -0.31 | 0.14              | -2.31   | 0.021    |
| LUSC  | 2.78                     | 494            | 5.23                         | 1.32                         | 0.82            | 0.67                       | 1.00                       | -0.20 | 0.10              | -1.95   | 0.051    |
| UCEC  | 2.68                     | 542            | 4.36                         | 0.44                         | 0.82            | 0.67                       | 1.01                       | -0.20 | 0.11              | -1.88   | 0.060    |
| HNSC  | 2.87                     | 509            | 4.41                         | 0.49                         | 0.87            | 0.73                       | 1.03                       | -0.14 | 0.09              | -1.60   | 0.109    |
| KIRP  | 2.31                     | 288            | 3.97                         | 0.06                         | 1.29            | 0.94                       | 1.77                       | 0.25  | 0.16              | 1.58    | 0.113    |
| READ  | 2.50                     | 158            | 4.14                         | 0.23                         | 0.58            | 0.29                       | 1.14                       | -0.55 | 0.35              | -1.58   | 0.113    |
| OV    | 2.50                     | 443            | 4.28                         | 0.36                         | 0.91            | 0.80                       | 1.03                       | -0.10 | 0.06              | -1.54   | 0.125    |
| SARC  | 2.74                     | 255            | 3.43                         | -0.48                        | 1.13            | 0.95                       | 1.35                       | 0.12  | 0.09              | 1.34    | 0.179    |
| STAD  | 2.77                     | 439            | 4.41                         | 0.49                         | 0.93            | 0.77                       | 1.12                       | -0.07 | 0.09              | -0.79   | 0.429    |
| BRCA  | 2.68                     | 1044           | 3.53                         | -0.39                        | 0.93            | 0.77                       | 1.12                       | -0.08 | 0.10              | -0.79   | 0.430    |
| LUAD  | 2.72                     | 567            | 5.06                         | 1.15                         | 0.93            | 0.76                       | 1.13                       | -0.07 | 0.10              | -0.73   | 0.466    |
| BLCA  | 2.62                     | 412            | 4.88                         | 0.97                         | 0.95            | 0.82                       | 1.10                       | -0.05 | 0.07              | -0.70   | 0.482    |
| LIHC  | 2.45                     | 374            | 4.20                         | 0.29                         | 1.07            | 0.88                       | 1.28                       | 0.06  | 0.10              | 0.66    | 0.506    |
| ESCA  | 2.67                     | 184            | 4.44                         | 0.53                         | 1.10            | 0.81                       | 1.49                       | 0.10  | 0.15              | 0.62    | 0.532    |
| COAD  | 2.55                     | 433            | 4.33                         | 0.42                         | 1.01            | 0.78                       | 1.31                       | 0.01  | 0.13              | 0.10    | 0.923    |

**Table S1 – Summary of univariate Cox proportional hazards analysis.** miR-155 expression was used as a continuous variable for these analyses. miR-155 expression was not uniformly associated with an improved outcome in all the solid tumors analyzed. Tumors with two highest mutational burden, melanoma (SKCM) and squamous lung cancer (LUSC), exhibited a lower miR-155 hazard ratio.
